# Supplementary material
Source: publisher site journal article supplement (https://www.degruyterbrill.com/publication/journal_key/JAA/downloadAsset/JAA_Manuscript%20Checklist.docx)
Supplement: Supplementary file 1 [file JAA_Manuscript%20Checklist.docx]

**General format and length of manuscript types accepted for submission**

**Word count: title page, abstract, tables, figures, references, abbreviations, appendices & supplementary material are excluded.**

|  | **Word count** | **Word count in abstract (max)** | **Number of keywords** | **Number of Tables & Figures (max)** | **Number of references (max)** | **Article** |
| --- | --- | --- | --- | --- | --- | --- |
| **Research Article/ Original Article/**  **Original Paper** | 3500 | 250, unstructured/  structured | 3‒6 | 8 | 50 | Structured |
| **Review (Article)** | 6000 | 250, unstructured/  structured | 3‒6 | 8 | 150 | Structured |
| **Editorial/Preface** | 1500 | n/a | n/a | 1 | 10 | Structured or unstructured |

**When you submit your work, please ensure the following**

- You have read the Instructions for Authors
- The manuscript is complete and uploaded correctly as Word file (or LaTeX). The HTML version and/or the PDF file generated from the submitted files must be complete and approved.
- The language in which the manuscript was written is correct and has been checked by a native speaker or a professional language service, if applicable.
- The title page information includes the full title, short title, at least one given or one middle name, and the family name in full of all authors, and the full address, affiliation and the academic title of the corresponding author. The title page should also indicate the word count, the number of tables and figures, and whether the submission includes any supplementary material.
- All figures and tables have been uploaded and appear correctly at the end of the generated PDF.
- Abstract, keywords, list of abbreviations, tables and figures, and captions and legends are included, depending on the manuscript type.
- Manuscript has been spell-checked and is within the word limit for the type of article.
- References are in the correct format according to the Instructions for Authors.
- References mentioned in the reference list are cited in the text and vice versa.
- Please check the data sharing policy stated in the Instructions for Authors or [here](https://degruyter-live-craftcms-assets.s3.amazonaws.com/Policy-2_20240625.pdf). We encourage authors to provide a data availability statement.

**Template for Ethical and Legal Declarations**

- Strictly adhere to the instructions and wording of the template.
- The information in the Template must be identical with the information in the manuscript.
- The information in the Template will be used to prepare the proofs of your article.
